# Supplementary material for: Emerging Mesoporous Polyacrylamide/Gelatin–Iron Lanthanum Oxide Nanohybrids towards the Antibiotic Drugs Removal from the Wastewater
Source: MDPI journal article supplement (doi:10.3390/nano13212835), 2023-10-26
Supplement: s1 [file s1]

## Supplementary Materials

### Emerging Mesoporous Polyacrylamide/Gelatin–Iron Lanthanum Oxide Nanohybrids towards the Antibiotic Drugs Removal from the Wastewater

Nazish Parveen <sup>1,\*</sup>, Fatimah Othman Alqahtani <sup>1</sup>, Ghayah M. Alsulaim <sup>1</sup>, Shada A. Alsharif <sup>2</sup>, Kholoud M. Alnahdi <sup>3</sup>, Hasna Abdullah Alali <sup>4</sup>, Mohamad M. Ahmad <sup>4,5</sup> and Sajid Ali Ansari <sup>4,\*</sup>

<sup>1</sup> Department of Chemistry, College of Science, King Faisal University, Al-Ahsa, P.O. Box 380, Hofuf 31982, Saudi Arabia

<sup>2</sup> University College of Umlj, University of Tabuk, Tabuk 71491, Saudi Arabia

<sup>3</sup> Department of Physics, Faculty of Science, University of Tabuk, Tabuk 71491, Saudi Arabia

<sup>4</sup> Department of Physics, College of Science, King Faisal University, Al-Ahsa, P.O. Box 400, Hofuf 31982, Saudi Arabia

<sup>5</sup> Department of Physics, Faculty of Science, The New Valley University, El-Kharga 72511, Egypt

\* Correspondence: nislam@kfu.edu.sa (N.P.); sansari@kfu.edu.sa (S.A.A.); Tel.: +966-13-589-6915 (N.P.)

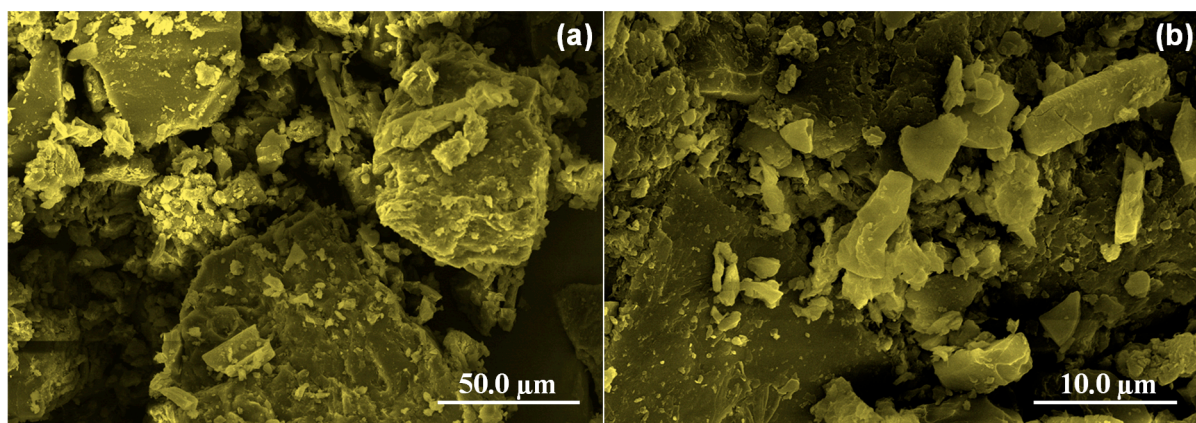

**Figure S1.** SEM images of the DF-P-G-ILO nanohybrids.

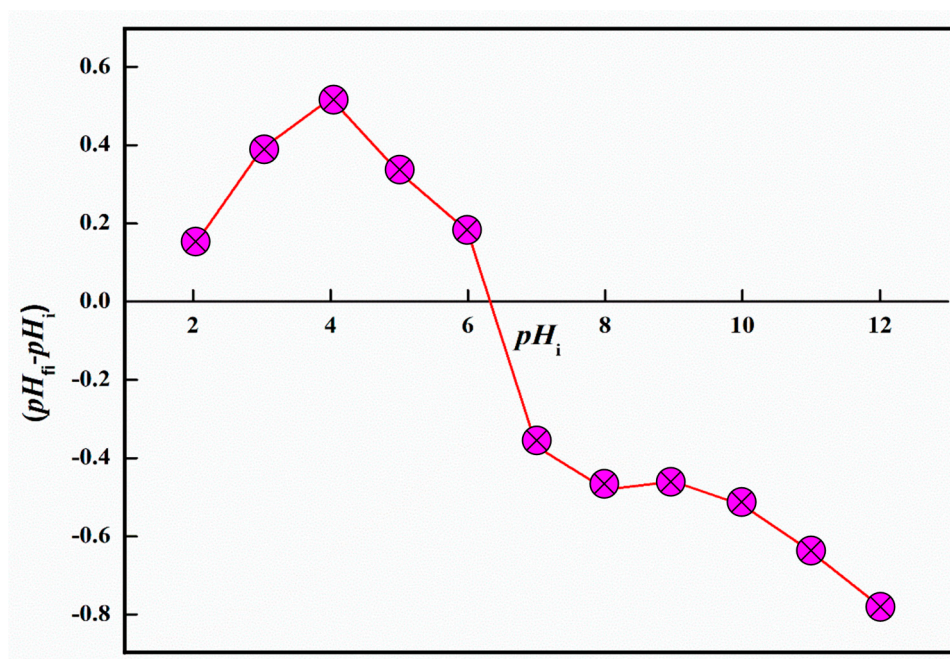

**Figure S2.** The zero point charge determination of P-G-ILO nanohybrids.

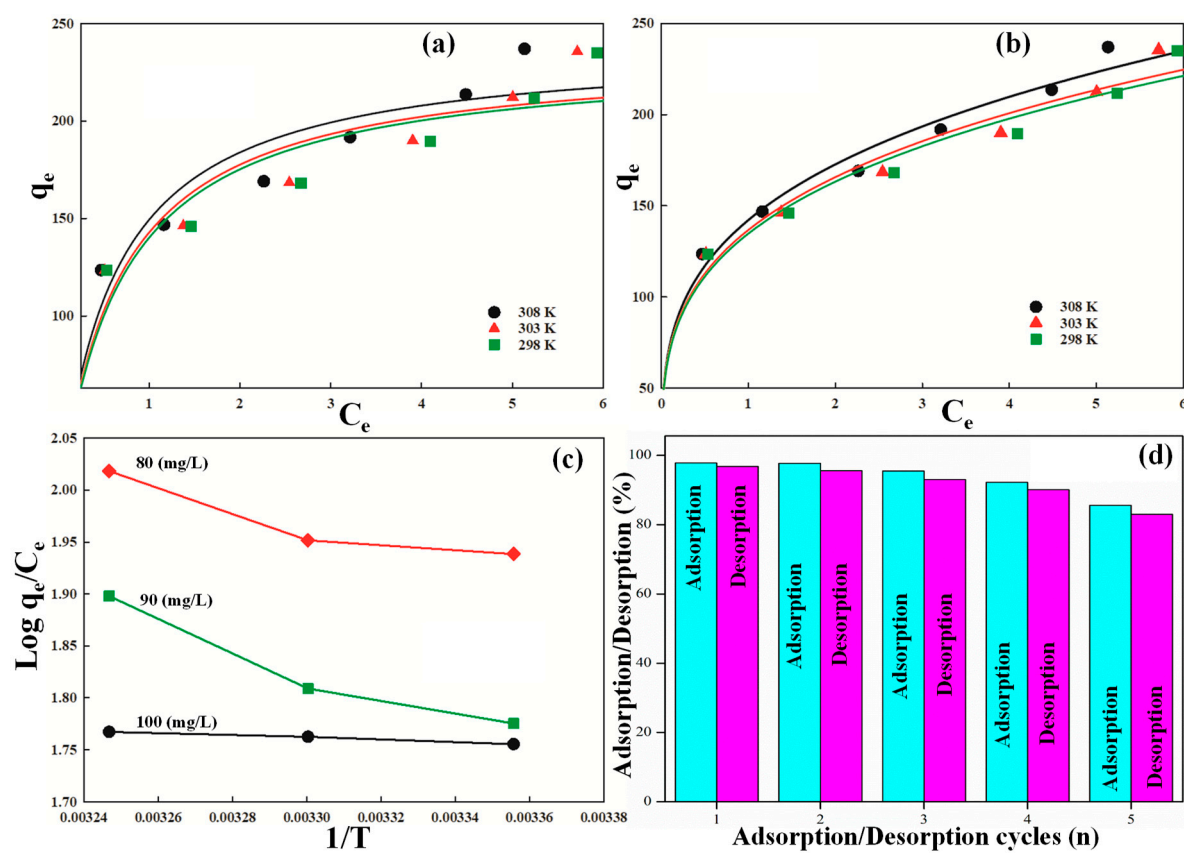

**Figure S3.** (a) Langmuir, (b) Freundlich isotherm plot of ILO nanoparticles, (c) thermodynamic plot for the DF adsorption onto P-G-ILO nanohybrids, and (d) Adsorption/desorption curve of P-G-ILO nanohybrids.

**Table S1:** actual and predicted values of adsorption capacities

| Run | Concentration<br>(mg/L) | pH | Time<br>(min) | Dose<br>(g/L) | Actual Value<br>$q_e$ | Predicted Value<br>$q_e$ |
|-----|-------------------------|----|---------------|---------------|-----------------------|--------------------------|
| 1   | 75                      | 6  | 10            | 0.9           | 77.72                 | 78.13                    |
| 2   | 75                      | 6  | 35            | 0.9           | 82.45                 | 82.33                    |
| 3   | 75                      | 6  | 35            | 0.9           | 82.45                 | 82.33                    |
| 4   | 50                      | 2  | 10            | 0.4           | 119.13                | 124.14                   |
| 5   | 100                     | 10 | 10            | 1.4           | 55.1                  | 48.01                    |
| 6   | 50                      | 10 | 60            | 0.4           | 86.41                 | 89.15                    |
| 7   | 100                     | 10 | 60            | 0.4           | 187.49                | 186.73                   |
| 8   | 75                      | 6  | 35            | 1.4           | 53.14                 | 61.3                     |
| 9   | 75                      | 6  | 60            | 0.9           | 79.62                 | 79.46                    |
| 10  | 50                      | 10 | 10            | 1.4           | 26.45                 | 31.36                    |
| 11  | 50                      | 6  | 35            | 0.9           | 55.15                 | 48.74                    |
| 12  | 100                     | 2  | 10            | 1.4           | 67.72                 | 68.32                    |
| 13  | 75                      | 6  | 35            | 0.9           | 82.45                 | 82.33                    |
| 14  | 100                     | 10 | 60            | 1.4           | 53.55                 | 51.89                    |
| 15  | 50                      | 2  | 60            | 1.4           | 33.27                 | 27.79                    |
| 16  | 50                      | 10 | 60            | 1.4           | 27.34                 | 29.75                    |
| 17  | 100                     | 2  | 60            | 0.4           | 241.54                | 239.98                   |
| 18  | 75                      | 6  | 35            | 0.9           | 82.45                 | 82.33                    |
| 19  | 100                     | 6  | 35            | 0.9           | 108.93                | 115.6                    |
| 20  | 75                      | 10 | 35            | 0.9           | 61.24                 | 56.05                    |
| 21  | 75                      | 6  | 35            | 0.9           | 82.45                 | 82.33                    |
| 22  | 75                      | 6  | 35            | 0.4           | 182.6                 | 174.7                    |
| 23  | 75                      | 6  | 35            | 0.9           | 82.45                 | 82.33                    |
| 24  | 75                      | 2  | 35            | 0.9           | 77.65                 | 83.09                    |
| 25  | 100                     | 2  | 10            | 0.4           | 241.54                | 235.72                   |
| 26  | 100                     | 2  | 60            | 1.4           | 68.64                 | 69.43                    |
| 27  | 100                     | 10 | 10            | 0.4           | 170.86                | 179.69                   |
| 28  | 50                      | 2  | 10            | 1.4           | 34.84                 | 32.18                    |
| 29  | 50                      | 10 | 10            | 0.4           | 91.81                 | 87.61                    |
| 30  | 50                      | 2  | 60            | 0.4           | 119.24                | 122.91                   |

**Table S2:** Isotherm parameters of FLO

| Langmuir           |                 |               |        |       |       | Freundlich                           |      |       |       |
|--------------------|-----------------|---------------|--------|-------|-------|--------------------------------------|------|-------|-------|
| Temperature<br>(K) | Parameters      |               |        |       |       | Parameters                           |      |       |       |
|                    | $q_m$<br>(mg/g) | $b$<br>(L/mg) | $R_L$  | $R^2$ | $SEE$ | $K_f$<br>(mg/g)(L/mg) <sup>1/n</sup> | 1/n  | $R^2$ | $SEE$ |
| 308                | 239             | 1.67          | 0.0059 | 0.833 | 19.27 | 142                                  | 0.28 | 0.960 | 9.38  |
| 303                | 234             | 1.56          | 0.0063 | 0.807 | 20.75 | 137                                  | 0.27 | 0.946 | 10.77 |
| 298                | 233             | 1.50          | 0.0066 | 0.800 | 20.72 | 135                                  | 0.27 | 0.942 | 11.11 |
